# Supplementary material for: Repurposing tofacitinib as an anti-myeloma therapeutic to reverse growth-promoting effects of the bone marrow microenvironment
Source: PubMed Central journal article supplement — Haematologica. 2018 Apr 5;103(7):1218–28. doi: 10.3324/haematol.2017.174482 (PMC6029548; doi:10.3324/haematol.2017.174482), 2018-07
Supplement: 2017_174482-Disclosures_and_Contributions.pdf [file 2017_174482-Disclosures_and_Contributions.pdf]

Haematologica  
HAEMATOL/2017/174482  
Version 3

Repurposing tofacitinib as an anti-myeloma therapeutic to reverse growth-promoting effects of the bone marrow microenvironment

Christine Lam, Ian D. Ferguson, Margarete C. Mariano, Yu-Hsiu T. Lin, Megan Murnane, Hui Liu, Geoffrey A. Smith, Sandy W. Wong, Jack Taunton, Jun O. Liu, Constantine S. Mitsiades, Byron C. Hann, Blake T. Aftab, and Arun P. Wiita

Disclosures: 1. Non-profit funding agencies: Silicon Valley Community Foundation, NIH, Damon Runyon Cancer Research Foundation, UCSF Multiple Myeloma Translational Initiative 2. No financial relationships to disclose 3. No patents or copyrights to disclose

Contributions: C.L., J.O.L., C.S.M., B.T.A., and A.P.W. conceived of the project and designed experiments. C.L., I.D.F., M.C.M., Y-H.T.L., M.M., H.L., B.C.H., B.T.A., and A.P.W. performed experiments and analyzed data. G.A.S., S.W., J.T. provided reagents. C.L. and A.P.W. wrote the manuscript with input from all authors.
